# Supplementary material
Source: publisher figshare collection journal article supplement (https://aacr.figshare.com/ndownloader/files/39816705)
Supplement: Supplementary file 1 [file 39816705]

| Name         | ATCC#     | Sex    | Age | Diagnosis                                                                                 |
|--------------|-----------|--------|-----|-------------------------------------------------------------------------------------------|
| DLD-1        | CCL-221   | Male   | -   | colon; epithelial; colorectal adenocarcinoma                                              |
| HCT-15       | CCL-225   | Male   | -   | colon; epithelial; colorectal adenocarcinoma                                              |
| Caco-2       | HTB-37    | Male   | 72  | primary colonic tumor                                                                     |
| LoVo         | CCL-229   | Male   | 56  | metastatic tumor nodule in the left supraclavicular region                                |
| HCT-116      | CCL-247   | Male   | -   | colon; colorectal carcinoma                                                               |
| SW-480       | CCL-228   | Male   | 50  | colon; colorectal adenocarcinoma                                                          |
| SK-CO-1      | HTB-39    | Male   | 65  | colon; metastatic site: ascites colorectal adenocarcinoma                                 |
| WiDr         | CCL-218   | Female | -   | colon; colorectal adenocarcinoma                                                          |
| T84          | CCL-248   | Male   | 72  | colon; metastatic site: lung colorectal carcinoma                                         |
| C2Bbe1       | CRL-2102  | Male   | 72  | cloned in from the Caco-2 cell line                                                       |
| SW-48        | CCL-231   | Female | 82  | colon; colorectal adenocarcinoma                                                          |
| SW-403       | CCL-230   | Female | 51  | colon; colorectal adenocarcinoma                                                          |
| SW-620       | CCL-227   | Male   | 51  | colon; metastatic site: lymph node colorectal adenocarcinoma                              |
| SW-837       | CCL-235   | Male   | 53  | rectum; adenocarcinoma                                                                    |
| SW-1463      | CCL-234   | Female | 66  | rectum; colorectal adenocarcinoma                                                         |
| HCT-8        | CCL-244   | Male   | 67  | colon; ileocecal colorectal adenocarcinoma                                                |
| SW-948       | CCL-237   | Female | 81  | colon; colorectal adenocarcinoma                                                          |
| SW-1116      | CCL-233   | Male   | 73  | colon; colorectal adenocarcinoma                                                          |
| SW-1417      | CCL-238   | Female | 53  | colon; colorectal adenocarcinoma                                                          |
| HT-29        | HTB-38    | Female | 44  | colon; colorectal adenocarcinoma                                                          |
| LS513        | CRL-2134  | Male   | 63  | primary Dukes' C mucin secreting cecal tumor located at the Bauhin valve                  |
| SNU-C2B      | CCL-250   | Female | 43  | cecum; colorectal carcinoma                                                               |
| LS1034       | CRL-2158  | Male   | 54  | Dukes' Type C, moderately to poorly differentiated cecal carcinoma                        |
| LS411N       | CRL-2159  | Male   | 32  | Dukes' B, poorly differentiated cecal carcinoma                                           |
| NCI-H716     | CCL-251   | Male   | 33  | derived from cells present in ascites fluid                                               |
| COLO 205     | CCL-222   | Male   | 70  | colon; metastatic site: ascites colorectal adenocarcinoma                                 |
| COLO 201     | CCL-224   | Male   | 70  | colon; metastatic site: ascites colorectal adenocarcinoma; derived from same patient as C |
| NCI-H508     | CCL-253   | Male   | 55  | derived from a metastasis to the abdominal wall                                           |
| LS 180       | CL-187    | Female | 58  | colon; colorectal adenocarcinoma                                                          |
| COLO 320 HSR | CCL-220.1 | Female | -   | colon; colorectal adenocarcinoma                                                          |
| COLO 320 DM  | CCL-220   | Female | -   | colon; colorectal adenocarcinoma                                                          |
| LS174T       | CL-188    | Female | 58  | colon; colorectal adenocarcinoma; Variant of 180T                                         |
| LS123        | CCL-255   | Female | 65  | colon; colorectal adenocarcinoma                                                          |
| NCI-H548     | CCL-249   | Male   | 52  | colon; adenocarcinoma                                                                     |
| LIM 1863     | -         | -      | -   | colon; colorectal carcinoma, organoid                                                     |
| NCI-H747     | CCL-252   | Male   | 69  | derived from a metastasis in a common duct node                                           |
| SNU-C2A      | CCL-250.1 | Female | 43  | cecum; colorectal carcinoma                                                               |
